# Supplementary material for: Prognostic significance of blood pressure response during vasodilator stress Rb-82 positron emission tomography myocardial perfusion imaging
Source: Springer Nature journal article supplement (doi:10.1007/s12350-016-0569-1), 2016-09-22
Supplement: MOESM2 [file 16994350]

| **Supplementary Table 2** Clinical descriptors of the 3,413 patient referred for stress myocardial perfusion Rb-82 PET by Resting Diastolic Blood Pressure Categories. | | | | |
| --- | --- | --- | --- | --- |
|  | **rDBP**  **<60mmHg**  **(*n* = 621 )** | **rDBP**  **≥60 to <90 mmHg**  **(*n* = 2514)** | **rDBP**  **≥90 mmHg**  **(*n* = 278 )** | ***P* value** |
| **Age** | 67.8 ± 12.8 | 64.3 ± 12.6 | 59.4 ± 12.7 | <0.001 |
| **Female** | 51.4% | 47.0% | 42.1% | 0.027 |
|  |  |  |  |  |
| **Cardiac Risk Factors** |  |  |  |  |
| Diabetes mellitus | 33.2% | 29.3% | 34.9% | 0.041 |
| Hypertension | 71.3% | 73.5% | 83.5% | <0.001 |
| Dyslipidemia | 66.8% | 63.4% | 57.6% | 0.027 |
| Known CAD | 43.6% | 35.4% | 26.6% | <0.001 |
| History of Smoking | 26.1% | 27.0% | 29.9% | 0.496 |
| History of Revascularization | 38.8% | 30.1% | 21.9% | <0.001 |
| History of MI | 29.4% | 25.2% | 19.5% | 0.006 |
|  |  |  |  |  |
| **Heart Rate** |  |  |  |  |
| Rest | 66.7 ± 13 | 68.4 ± 13 | 73.3 ± 13 | <0.001 |
| Peak Stress | 80.8 ± 15 | 83.7 ± 15 | 86.7 ± 14 | <0.001 |
|  |  |  |  |  |
| **Heart Rate Response** |  |  |  |  |
| >4 bpm | 22.4% | 17.8% | 20.5% | 0.014 |
| 5-14 bpm | 32.9% | 33.2% | 38.1% |  |
| >15 bpm | 44.7% | 49.0% | 41.4% |  |
|  |  |  |  |  |
| **Systolic Blood Pressure** |  |  |  |  |
| Rest | 122.1 ± 21 | 139.3 ± 22 | 169.5 ± 24 | <0.001 |
| Stress | 112.9 ± 22 | 128.3 ± 23 | 153.3 ± 27 | <0.001 |
|  |  |  |  |  |
| **Diastolic Blood Pressure** |  |  |  |  |
| Rest | 52.7 ± 6 | 72.8 ± 8 | 97.5 ± 8 | <0.001 |
| Peak Stress | 51.0 ± 11 | 63.9 ± 12 | 80.5 ± 14 | <0.001 |
|  |  |  |  |  |
| **% Abnormal Myocardium at Rest** |  |  |  | <0.001 |
| <5% | 77.1% | 83.9% | 87.8% |  |
| 5.0-9.9% | 9.2% | 5.9% | 6.1% |  |
| ≥10% | 13.7% | 10.2% | 6.1% |  |
|  |  |  |  |  |
| **% Ischemic Myocardium (SDS)** |  |  |  | 0.049 |
| <5% | 71.8% | 76.2% | 80.2% |  |
| 5.0-9.9% | 14.2% | 11.0% | 9.4% |  |
| ≥10% | 14.0% | 12.8% | 10.4% |  |
|  |  |  |  |  |
| **Medications** |  |  |  |  |
| Beta-blockers | 54.6% | 53.3% | 60.1% | 0.095 |
| Diuretics | 33.4% | 29.8% | 31.0% | 0.208 |
| Lipid Lowering Drugs | 62.9% | 59.7% | 53.1% | 0.021 |
| ACE Inhibitors | 41.0% | 36.0% | 44.0% | 0.005 |
| Calcium Channel Blockers | 22.1% | 22.6% | 24.5% | 0.708 |
| Aspirin | 55.5% | 54.8% | 48.5% | 0.206 |
|  |  |  |  |  |
